# Supplementary material
Source: PubMed Central journal article supplement (PMC2666183)

Supplemental Figure 2

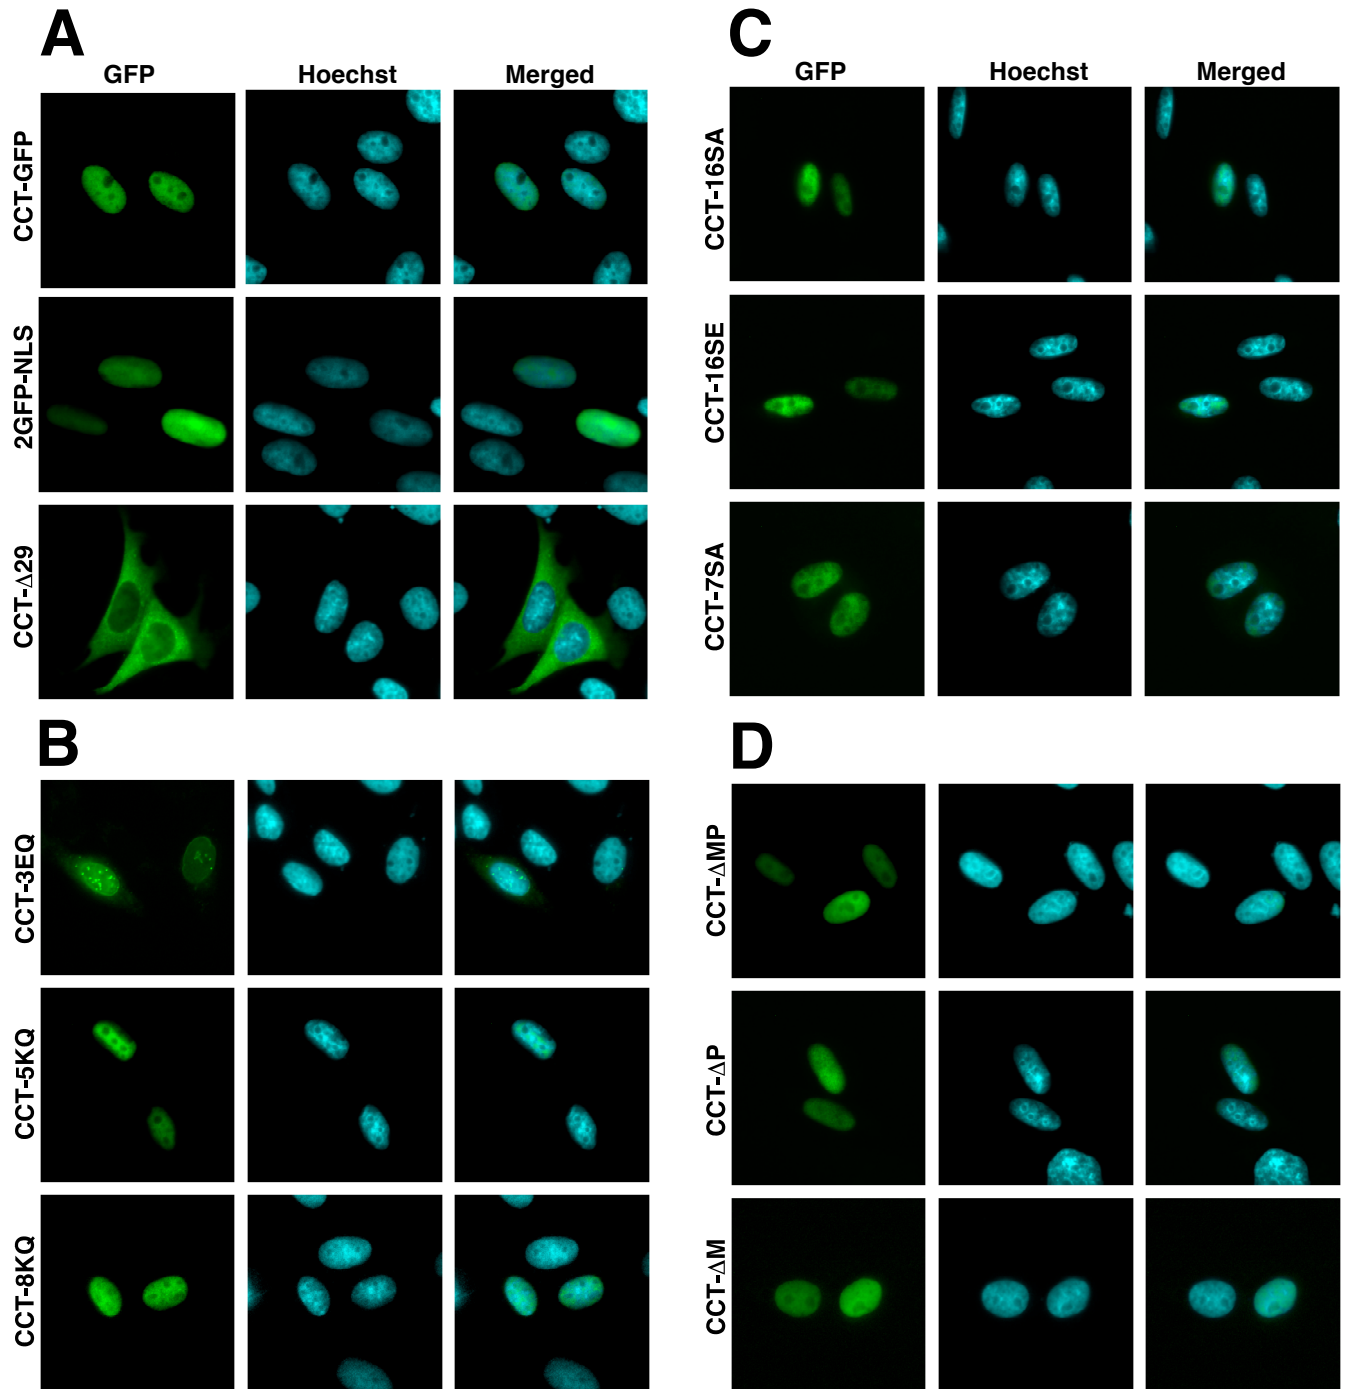

Supplement: supp_M800632-JLR200_SFig2.pdf [file supp_M800632-JLR200_SFig2.pdf]
